# Supplementary material
Source: Springer Nature journal article supplement (https://www.springermedizin.de/resource/supplementary/12889_2010_3026_MOESM3_ESM.pdf/9487790)

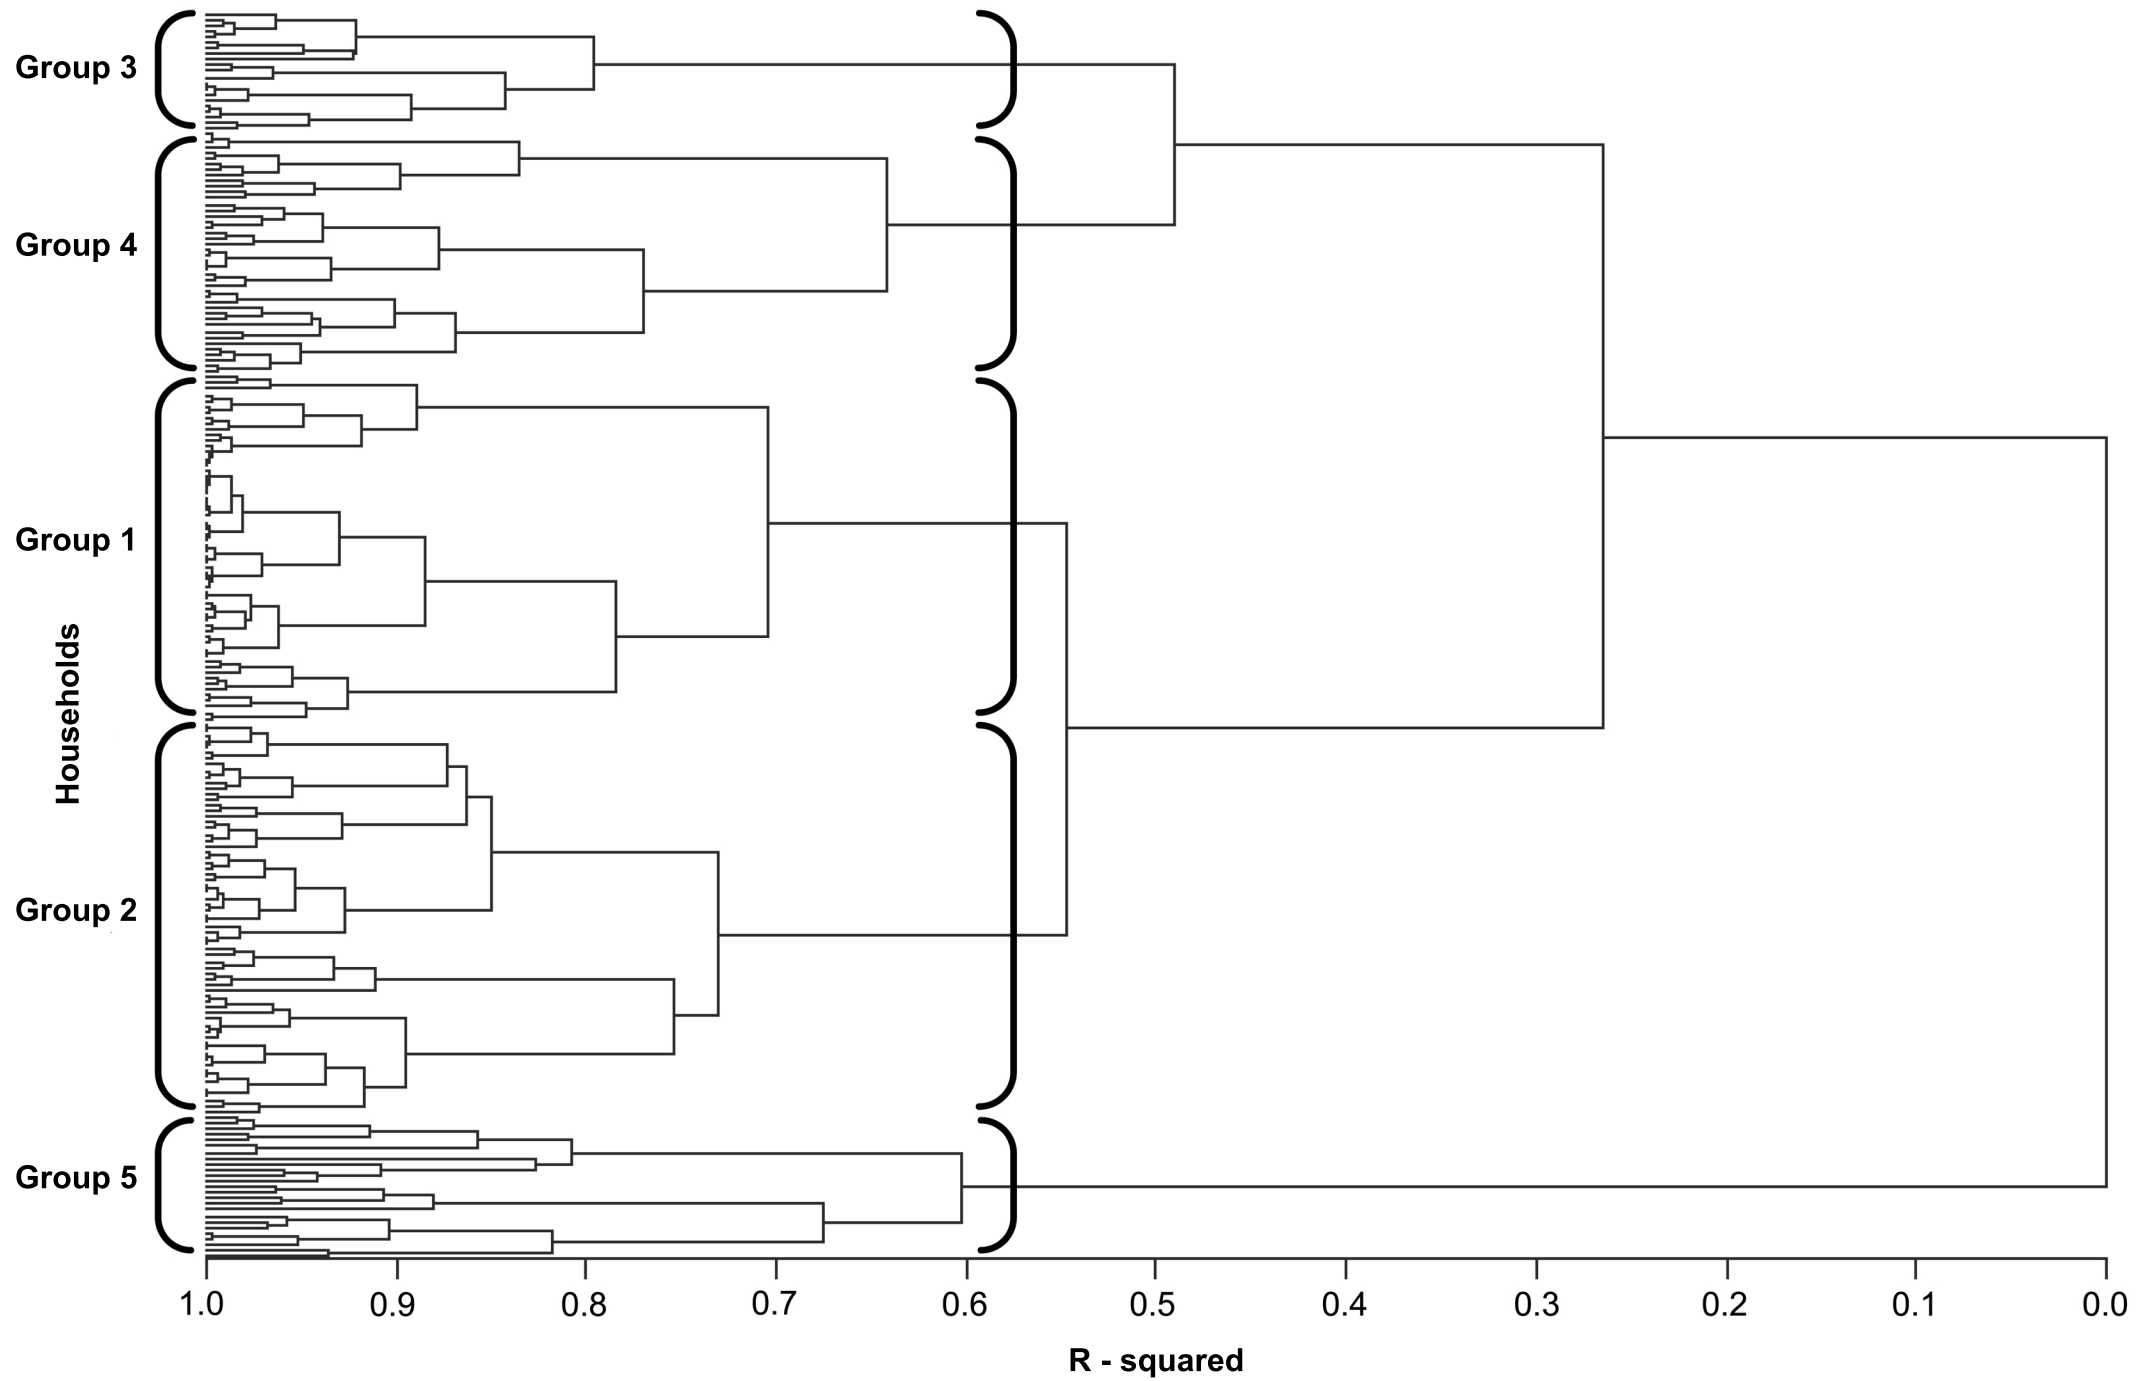

Supplement: MOESM3 [file 9487790]
